# Supplementary material for: Charge carrier exchange at chemically modified graphene edges: a density functional theory study
Source: Royal Society of Chemistry journal article supplement (doi:10.1039/c2jm30387f), 2012-01-01
Supplement: c2jm30387f.pdf [file c2jm30387f.pdf]

## Electronic Supplementary Information

### Charge Carrier Exchange at Chemically Modified Graphene Edges: a Density Functional Theory Study

Ting Liao,<sup>a</sup> Chenghua Sun,<sup>a,b</sup> Aijun Du,<sup>a</sup> Ziqi Sun,<sup>c</sup> Denisa Hulicova-Jurcakova<sup>b</sup> and Sean Smith<sup>\*d</sup>

The molecular geometry of hydronium ( $\text{H}_3\text{O}^+$ ) is trigonal pyramidal with three bonding pairs and one lone pair, as illustrated in Fig. S1a. The calculated O-H bond length  $d$  and  $\Delta\text{HOH}$  angle  $\theta$  are 0.991 Å and 112.5°, respectively, agreeing well with the experimental data with a deviation no larger than 2.0% [1]. The energy level diagram of hydronium based on band energy calculation is shown in Fig. S1b. In this energy window there appear four occupied MOs of hydronium: the lowest lying  $a_1$  bonding orbital, the double degenerate  $e$ , and the lone-pair  $a_1$  orbital. The isosurface of the lowest five eigenstates of  $\text{H}_3\text{O}^+$  have been identified in the right panel of Figure 1b as mainly of  $C_{3v}$  symmetric bonding character.

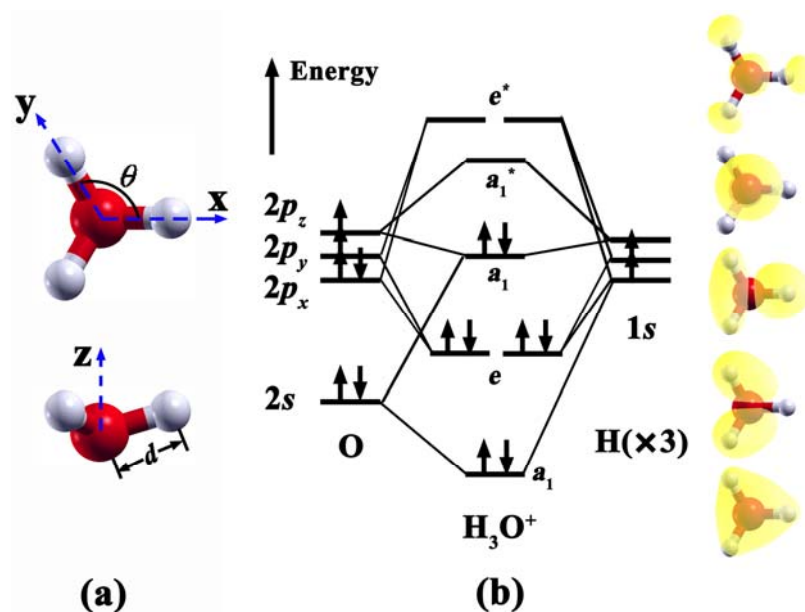

**Fig. S1** (a) Top and side views of molecular structure of hydronium, (b) Energy level diagram and the views of the isosurface of the lowest five eigenstates of hydronium.

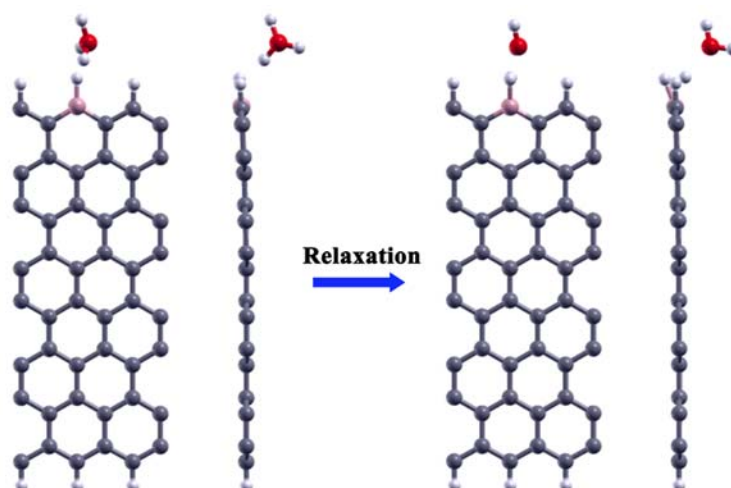

**Fig. S2** Top and side views of proton transferred to hydrogen passivated B-doped ribbon edge from hydronium  $\text{H}_3\text{O}^+$ .

|                | Mulliken Charge (e)<br>Before $\text{H}^*$ transfer |              |              | Mulliken Charge (e)<br>After $\text{H}^*$ transfer |              |              |
|----------------|-----------------------------------------------------|--------------|--------------|----------------------------------------------------|--------------|--------------|
|                | Edge atom                                           | $\text{H}^*$ | $\text{C}^*$ | Edge atom                                          | $\text{H}^*$ | $\text{C}^*$ |
| B-doped ribbon | 2.49                                                | 0.59         | 4.31         | 2.66                                               | 0.91         | 4.24         |
| Undoped ribbon | 4.17                                                | 0.52         | 4.03         | 4.22                                               | 0.66         | 4.00         |
| N-doped ribbon | 5.42                                                | 0.50         | 3.84         | 5.49                                               | 0.54         | 3.84         |
| O-doped ribbon | 6.43                                                | 0.49         | 3.75         | 6.44                                               | 0.49         | 3.80         |

**Table. S1** Mulliken population charge of proton  $\text{H}^*$ , edge atom and the carbons atoms  $\text{C}^*$  in proximity to the edge atom when proton was transferred from hydronium  $\text{H}_3\text{O}^+$  to the doped ribbon edge.

## References

- 1 J. Tang and T. Oka, *J. Mol. Spec.* 1999, **196**, 120.
